1 **Assignment of virus and antimicrobial resistance genes to microbial**  
2 **hosts in a complex microbial community by combined long-read**  
3 **assembly and proximity ligation**

4

5 Derek M. Bickhart\*<sup>1</sup>, Mick Watson\*<sup>2</sup>, Sergey Koren\*<sup>3</sup>, Kevin Panke-Buisse<sup>1</sup>, Laura M.  
6 Cersosimo<sup>4</sup>, Maximilian O. Press<sup>5</sup>, Curtis P. Van Tassell<sup>6</sup>, Jo Ann S. Van Kessel<sup>7</sup>, Bradd J.  
7 Haley<sup>7</sup>, Seon Woo Kim<sup>7</sup>, Cheryl Heiner<sup>8</sup>, Garret Suen<sup>9</sup>, Kiranmayee Bakshy<sup>1</sup>, Ivan Liachko<sup>5</sup>,  
8 Shawn T. Sullivan<sup>5</sup>, Jay Ghurye<sup>10</sup>, Mihai Pop<sup>10</sup>, Paul J. Weimer<sup>1,9</sup>, Adam M. Phillippy<sup>3</sup>, Timothy  
9 P.L. Smith<sup>11‡</sup>

10

11 1 Cell Wall Biology and Utilization Laboratory, Dairy Forage Research Center, USDA, Madison, WI, 53706, USA

12 2 Division of Genetics and Genomics, The Roslin Institute, Royal (Dick) School of Veterinary Studies, University  
13 of Edinburgh, Easter Bush, EH25 9RG, UK

14 3 Genome Informatics Section, Computational and Statistical Genomics Branch, National Human Genome Research  
15 Institute, Bethesda, Maryland, USA

16 4 Department of Animal Sciences, University of Florida, Gainesville, FL, 32611, USA

17 5 Phase Genomics Inc., Seattle, WA 98109, USA

18 6 Animal Genomics and Improvement Laboratory, Beltsville Agricultural Research Center, Agricultural Research  
19 Service, USDA, Beltsville, MD 20705 USA

20 7 Environmental Microbial and Food Safety Laboratory, Beltsville Agricultural Research Center, Agricultural  
21 Research Service, USDA, Beltsville, MD 20705 USA

22 8 Pacific Biosciences, Menlo Park, CA, USA

23 9 Department of Bacteriology, University of Wisconsin-Madison, Madison, WI, 53706, USA

24 10 Department of Computer Science, University of Maryland, College Park, MD, 20742, USA

25 11 USDA-ARS U.S. Meat Animal Research Center, Clay Center, NE, 68933, USA

26

27 \* These authors contributed equally to this work

28 ‡Corresponding Author:

## 29 **Abstract**

30           The characterization of microbial communities by metagenomic approaches has been  
31 enhanced by recent improvements in short-read sequencing efficiency and assembly algorithms.  
32 We describe the results of adding long-read sequencing to the mix of technologies used to  
33 assemble a highly complex cattle rumen microbial community, and compare the assembly to  
34 current short read-based methods applied to the same sample. Contigs in the long-read assembly  
35 were 7-fold longer on average, and contained 7-fold more complete open reading frames (ORF),  
36 than the short read assembly, despite having three-fold lower sequence depth. The linkages  
37 between long-read contigs, provided by proximity ligation data, supported identification of 188  
38 novel viral-host associations in the rumen microbial community that suggest cross-species  
39 infectivity of specific viral strains. The improved contiguity of the long-read assembly also  
40 identified 94 antimicrobial resistance genes, compared to only seven alleles identified in the  
41 short-read assembly. Overall, we demonstrate a combination of experimental and computational  
42 methods that work synergistically to improve characterization of biological features in a highly  
43 complex rumen microbial community.

## 44 **Background**

45           Microbial genome assembly from metagenomic sequence of complex communities  
46 produces large numbers of genome fragments, rather than complete circular genomes, despite  
47 continuous improvements in methodology (1,2). Assembly is complicated by sequences that may  
48 occur repeatedly within strains (“repeats”) or shared among similar strains of bacterial and  
49 archaeal species, creating “branches” in the assembly graph that precludes accurate  
50 representation of individual component genomes, particularly when multiple closely-related  
51 strains of a species are present in the environment (3). Repetitive content contributes to difficulty  
52 in multicellular Eukaryotic genome assembly as well (4), but the problem becomes more  
53 complicated in metagenome assembly (5) due to the wide range of abundance among bacterial  
54 species and strains, and the presence of other environmental DNA (e.g. plants, protists).

55           The application of long-read sequencing appears to be a potential solution to many of the  
56 difficulties inherent to metagenomic assembly. Read lengths that exceed the size of highly  
57 repetitive sequences, such as ribosomal RNA gene clusters, have been shown to improve contig  
58 lengths in the initial assembly (6,7). However, longer repetitive regions are only capable of being

59 completely resolved by long reads of equal or greater size to the repeat, which makes input DNA  
60 quality a priority in sequence library construction. This can present a problem in metagenomics  
61 samples as material-adherent bacterial populations produce tough extracellular capsules that  
62 require vigorous mechanical stress for lysis, resulting in substantial DNA fragmentation and  
63 single-strand nicks (8). Long-read sequencing technologies have been previously used in the  
64 assembly of the skin microbiome (9), several environmental metagenomes (10), and in the  
65 binning of contigs from a biogas reactor<sup>12</sup>; however, each of these projects has relied on  
66 additional coverage from short-read data to compensate for lower long-read coverage.  
67 Additionally, higher depths of coverage of long-reads from current generation sequencing  
68 technologies are necessary to overcome high, relative error rates that can impact assembly  
69 quality and influence functional genomic annotation (11). Still, there is substantial interest in  
70 generating assemblies derived from longer reads to enable better characterization of  
71 environmental and complex metagenomics communities (10). Metagenome WGS assemblies  
72 consisting entirely of long-reads have yet to be fully characterized, particularly those from  
73 complex, multi-kingdom symbiotic communities.

74         The bovine rumen is an organ that serves as the site of symbiosis between the cow and  
75 microbial species from all three taxonomic Superkingdoms of life that are dedicated to the  
76 degradation of highly recalcitrant plant polymers (12). With efficiency unrivaled by most abiotic  
77 industrial processes, the protists, archaea, bacteria and fungi that make up the rumen microbial  
78 community are able to process cellulose and other plant biopolymers into byproducts, such as  
79 volatile fatty acids (VFA), that can be utilized by the host. This process is supplemented by  
80 relatively minimal energy inputs, such as the basal body temperature of the host cow and the  
81 energy-efficient mastication of digesting plant material. The presence of organisms from all  
82 major Superkingdoms in varying degrees of abundance makes the rumen an excellent model for  
83 a complex, partially-characterized metagenome system. Assessments of rumen microbial  
84 presence and abundance have generally been limited to 16S rRNA amplicon sequencing (13–15);  
85 however, recent genome assemblies of metagenomic samples (16,17) or isolates (18) derived  
86 from the rumen provide suitable standards for the comparison of new assembly methods and  
87 techniques.

88           In this study, we compare and contrast several different technologies that are suitable for  
89 metagenome assembly and binning, and we highlight distinct biological features that each  
90 technology is able to best resolve. We show that contigs generated using longer-read sequencing  
91 tend to be larger than those generated by shorter-read sequencing methods; long-reads assemble  
92 more full-length genes and antimicrobial resistance gene alleles; and that long-reads can be  
93 suitable for identifying the host-specificity of assembled viruses/prophages in a metagenomics  
94 community. We also highlight novel host-viral associations and the potential horizontal transfer  
95 of antimicrobial resistance genes (ARG) in rumen microbial species using a combination of  
96 long-reads and Hi-C intercontig link data. Our data suggests that future metagenomics surveys  
97 should include a combination of different sequencing and conformational capture technologies in  
98 order to fully assess the diversity and biological functionality of a sample.

99

## 100 **Results**

### 101 **Sample extraction quality and *de novo* genome assemblies**

102           We extracted high molecular weight DNA from a combined rumen fluid and solid sample  
103 taken from a single, multiparous, cannulated cow and sequenced that sample using a short-read  
104 and a long-read DNA sequencing technology (see methods; Fig 1a). The short-read and long-  
105 read data were assembled separately and generated *de novo* assemblies with contig N100K  
106 counts (the number of contigs with lengths greater than 100 kbp) of 88 and 384, respectively  
107 (Table 1). While the long-read assembly was mostly comprised of larger contigs, the short-read  
108 assembly contained five-fold more assembled bases (1.0 gigabases vs. 5.1 gigabases). We also  
109 observed a slight bias in the GC content of assembled contigs, with the short-read assembly  
110 having a larger sampling of different, average GC content tranches than the long-read assembly  
111 in observed, assembled contigs (Fig 1b). Interestingly, the average GC content of the error-  
112 corrected long-reads indicated a bimodal distribution at the 0.5 and 0.25 ratios (Figure 1b) that is  
113 less pronounced in the GC statistics of the raw short-reads and both sets of assembly contigs.  
114 There are several possibilities for this discrepancy; however, it is possible that this lower GC  
115 content range belongs to unassembled protist or anaerobic fungi genomes which are known to be  
116 highly repetitive, and have low GC content (19,20).

117 We noticed a slight discrepancy in the Superkingdom-specific contig lengths that  
118 suggests that many of our contigs of potential Eukaryotic-origins are shorter than those of the  
119 Bacteria and Archaea, which coincided with our observation of GC content bias in the assembly  
120 (Fig 1c). To assess the bias in GC content in our assembly of the long-read data, we calculated  
121 the overlap of raw long-reads with our long-read assembly contigs. Density estimates of long-  
122 reads that were not included in the long-read assembly (zero overlaps) mirrored the bimodal  
123 distribution of GC content in the raw long-reads previously observed, suggesting that a larger  
124 proportion of lower GC content reads had insufficient coverage to be assembled (Additional file  
125 1: Fig S1). Furthermore, we note that the error corrected long-reads were filtered based on intra-  
126 dataset overlaps, resulting in a further reduction of bases compared with the starting, raw long-  
127 reads. The correction step removed 10% of the total reads for being singleton observations (zero  
128 overlaps with any other read) and trimmed the ends of 26% of the reads for having less than 2  
129 overlaps. This may have also impacted the assembly of low abundance or highly complex  
130 genomes in the sample by removing rare observations of DNA sequence. We attempted to  
131 combine both the long-read and short-read datasets into a hybrid assembly; however, all attempts  
132 using currently available software were unsuccessful as currently available tools had prohibitive  
133 memory or runtime requirements due to the size of our input assemblies. We also investigated  
134 the use of long-reads in multiple-datasource scaffolding programs and found only minor  
135 improvements in assembly size that were achieved through the inclusion of a high number of  
136 ambiguous base pairs (Additional file 1: Supplementary Methods).

### 137 **Comparing binning performance and statistics**

138 We applied computational (MetaBat) (21) and conformational capture methods  
139 (ProxiMeta Hi-C) (22) in order to bin assembled contigs into clusters that closely resembled the  
140 actual genomic content of unique species of rumen microbes (Additional file 1: Supplementary  
141 Methods). The number of contigs per bin varied based on the binning method; however, the  
142 long-read assembly bins had nearly an order of magnitude fewer contigs per bin than the short-  
143 read assembly regardless of method (Fig 2a). We also saw a clear discrepancy between binning  
144 methods, with ProxiMeta preferably binning smaller (< 2,500 bp) contigs with higher GC (>  
145 42%) than MetaBat (Chi-Squared test of independence  $p < 0.001$ ; Additional file: Fig S2).

146 We further assessed bin quality and removed redundant contig-bin assignments between  
147 methods, using the single-copy gene (SCG) metrics of cluster contamination and completeness  
148 from the DAS\_Tool (23) package (Fig 2c, d; Additional file 2, 3). We then sorted the revised  
149 DAS\_Tool bins into a set of higher completion (HC) bins with less than 5% SCG redundancy  
150 and greater than 80% SCG completion, and a set of bins for analysis (AN) with less than 10%  
151 SCG redundancy (Fig 2b; Table 2). Since DAS\_Tool assesses bin quality using bacterial and  
152 archaeal SCG metrics, we did not use a completion filter for the AN bin set as that would remove  
153 candidate high quality eukaryotic and viral bins from our analysis dataset. Our HC bin dataset  
154 contains 22 and 69 draft microbial genomes in the long-read and short-read datasets,  
155 respectively, with at least an 80% SCG completeness estimate and with less than 5% SCG  
156 redundancy (Fig 2e). The AN binset contained 1,028 and 3,757 long-read and short-read  
157 consolidated bins, respectively, which were used in subsequent analysis and characterization.

### 158 **Taxonomic classification reveals assembly bias**

159 Taxonomic classification of the HC bin and AN binsets revealed a heavy preference  
160 towards the assembly of contigs of bacterial-origin vs archaeal- and eukaryotic-origin (Fig 3c;  
161 Additional file 1: Figures S3, S4). Both the short- and long-read HC bins contain only one bin,  
162 each consisting of Archaeal-origin sequence. The short-read archaeal HC bin was best classified  
163 as being a high quality draft from the *Thermoplasmatales* order; however, the long-read archaeal  
164 bin was identified as belonging to the genus *Methanobrevibacter* from the family  
165 *Methanobacteriaceae*. Contig taxonomic assignment generated by the BlobTools(24) workflow  
166 varied greatly among the short-read HC bins, with an average of 5 different phyla assignments  
167 per contig per bin (Additional files 4, 5). We identified 30 full-length (> 1,500 bp) predicted 16S  
168 rDNA genes in the HC bins, and only fragmentary (< 1,500 bp) 16S genes in the short-read  
169 assembly (Additional file 6). The long-read AN bins contained 239 full-length 16S genes, and all  
170 but 5 of the genes matched the original superkingdom taxonomic classification of the bin that  
171 contained the gene. Of these five discrepancies, three contigs were classified as “Eukaryotic” in  
172 origin, yet contained a predicted Archaeal 16S gene.

### 173 **Comparison to other datasets reveals novel sequence**

174 Contig novelty was assessed via direct overlap with other rumen metagenomic  
175 assemblies and via alignment with WGS reads from other publically accessible sources (Fig

176 3a,3b). We identified many contigs in our short-read and long-read assemblies that did not have  
177 analogous alignments to the recently published Stewart et al. (17) and Hungate 1000(18)  
178 assemblies. From our HC bins, 3697 and 92 contigs from the short- and long-read assemblies,  
179 respectively, did not align to any sequence in these two datasets, consisting of 23.5 and 1.7  
180 megabases of assembled sequence that was missing from the previous, high quality, reference  
181 datasets for the rumen microbiome (Additional files 7, 8). Expanding the comparison to the AN  
182 binset, we identified 207,599 (669 Mbp) and 12,421 contigs (137 Mbp) in the short- and long-  
183 read assemblies, respectively, that did not have analogs in the previous rumen datasets (Fig 3a,  
184 3b). From the AN bins with no alignments to other published datasets, we identified 152,739 and  
185 185 contigs in the short- and long-read AN binsets that did not have analogous alignments to the  
186 other respective dataset (e.g. short-read vs long-read). This represented 435 Mbp of exclusive  
187 sequence in the short-read dataset not contained in our long-read dataset. However, we also  
188 identified 1.18 Mbp that was novel to the long-read AN bins despite the coverage disparity  
189 between the two datasets. Contigs that were exclusive to the long-read dataset were primarily of  
190 Firmicutes-origin, and had a higher median GC% value than other contigs in the long-read  
191 dataset (Kolmogorov-Smirnov  $p = 4.12 \times 10^{-5}$ ).

192 We wanted to compare the short-read sequence of our sample against other published  
193 rumen WGS datasets to see if there were differences in sample community composition that may  
194 have accounted for novel assembled sequence in our dataset. We aligned the WGS reads from  
195 each dataset to our assemblies (Additional file 1: Table S15), and we created a normalized read  
196 depth matrix from contigs from our short- and long-read datasets that had at least a Genus-level  
197 taxonomic assignment. We then counted the number of times per Genus where a contig had a  
198 higher mapping percentage in our sample compared to all other sampled WGS datasets and used  
199 a hypergeometric test to calculate the relative enrichment of observations per taxonomic group.  
200 In both the short-read and long-read datasets, six AN bins belonging to the Eukaryote  
201 superkingdom were significantly enriched (hypergeometric  $p$  value  $< 1 \times 10^{-7}$  in all cases),  
202 suggesting that the WGS reads derived from the SRA datasets had lower coverage of these  
203 fungal and protist genomes than our WGS reads. In terms of assembly-specific enrichment, the  
204 short-read assembly had a larger proportion of Eukaryote-origin contigs that were found to be  
205 significantly enriched in coverage compared to the long-read assembly (Additional file 9). This  
206 may have resulted from the previously noted assembly discrepancy, where the short-read

207 assembly was far more likely than the long-read assembly to assemble low GC% Eukaryote  
208 contigs from lower coverage data despite sampling proportionally fewer reads from lower GC%  
209 tranches.

### 210 **Increased long-read contiguity results in more predicted ORFs per contig**

211 We sought to assess whether the increased contiguity of the long-read assembly contigs  
212 provided tangible benefits in the annotation and classification of open reading frames (ORFs) in  
213 our AN bin dataset. From prodigal (25) annotation of the AN bins from both assemblies, we  
214 identified 868,429 and 984,623 complete ORFs in the long-read and short-read assemblies,  
215 respectively (Additional files 10, 11). We found a lower fraction of identified partial ORFs in the  
216 long-read AN bins (55,002 partial ORFs; 6% of the complete ORF count) compared to the short-  
217 read AN bins (365,281 partial; 37% of the complete ORF count). This would suggest that,  
218 despite a lower total count of total ORFs identified, the long-read bins more frequently contained  
219 complete ORFs than did the short-read bins. We also found a higher mean count of ORFs per  
220 contig in the long-read AN bins (mean: 15.79) than the short-read bins (mean: 2.69). This  
221 difference in average counts was found to be significant (Kolmogorov-Smirnov test  $p$  value  $<$   
222 0.001) and may be due to the presence of longer contigs found in the long-read assembly dataset.  
223 The majority of partial ORF predictions occur within the first 50 bp of contigs in the long read  
224 (99.9%; Chi squared  $p < 0.001$ ) and short read (95.2%;  $p < 0.001$ ) AN bins, suggesting that  
225 ORFs were prematurely terminated by contig breaks. In the short read AN bins, a surprising  
226 proportion of ORFs missing both a start and stop codon (23,458 ORFs; 6.4% of the total count of  
227 partial ORFs) occur near the beginning of the contig compared to the long read bin set (56  
228 ORFs). However, we identified a slight discrepancy in ORF length between the long-read  
229 (median ORF length: 533 bp) and short-read (median: 584 bp) assemblies, with the later  
230 containing longer predicted ORFs than the long-read assembly.

231 We identified clear differences in gene content between the two assemblies that suggest a  
232 bias in functional ORF classification and discovery. Using cluster of orthologous group (COG)  
233 assignments to predicted ORFs in both assemblies, we identified a discrepancy in the  
234 proportional count of several major COG categories. The long-read Bacterial AN binset  
235 contained proportionally more L (Replication, recombination and repair), Q (Secondary  
236 metabolites), P (Inorganic ion transport) and H (Coenzyme transport/metabolism) COG ORFs



237 than the short-read bins, and proportionally less J (Translation) and M (Cell wall) COG ORFs  
238 (Additional file 1: Figure S5, Table S11) as determined by a Fisher's exact test. Conversely, the  
239 long-read Archaeal AN bins contained more J and C (Energy production and conversion) COG  
240 ORFs than the short-read assembly, while still having proportionally fewer M COG ORFs. The  
241 V (Defense mechanisms) COG category was proportionally higher in the short-read assembly for  
242 both the Bacterial and Archaeal lineages, suggesting a higher proportion of defense-related ORFs  
243 were assembled in that dataset.

#### 244 **Host-prophage association and CRISPR array identification**

245 Longer reads have the potential to provide direct sequence-level confirmation of  
246 prophage insertion into assembled genomes by spanning direct repeats that typically flank  
247 insertion sites (26). To identify candidate host-specificity for assembled prophage genomes, we  
248 used a heuristic alignment strategy with our error corrected long-reads (Additional file 1 :  
249 Supplementary Methods) and Hi-C intercontig link density calculations. PacBio sequence data  
250 have a known propensity for chimerism(27); however, we assumed that identical, chimeric  
251 PacBio reads would be unlikely to be seen more than once in our dataset. Similarly, we filtered  
252 Hi-C read alignments to identify virus-host contig pairs with higher link counts to identify host-  
253 viral associations in each assembly (Additional file 1 : Supplementary Methods). Several viral  
254 contigs in the long-read assembly had substantial associations with contig groups affiliated with  
255 more than one genus (a maximum of 11 distinct genus-level classifications for one viral contig  
256 from the Myoviridae), suggesting a wide host-specificity for these species (Fig 4a). Long-read  
257 assembly viral contigs with multiple candidate host associations were identified as belonging to  
258 the Podoviridae, Myoviridae and Siphoviridae families, which are viral families typically  
259 encountered in bovine rumen microbial samples (28). Viral contigs from the short-read assembly  
260 were associated with fewer candidate host genus OTUs (four distinct associations at maximum;  
261 Fig 4b). It is possible that the shorter length of Illumina assembly viral contigs (average size:  
262 4140 bp , standard deviation(sd): 5376 bp) compared with the long-read assembly contigs  
263 (average: 20,178bp, sd: 19,334 bp) may have reduced the ability to identify host-phage  
264 associations in this case. Having identified read alignments between viral contigs and non-viral  
265 contigs, we sought to leverage conformational capture via Hi-C to see if we could confirm the  
266 viral-host associations.

267 We found that our Hi-C link analysis and PacBio read alignment analysis had very little  
268 overlap; however, we identified a tendency for each method to favor a different class of virus-  
269 host association which suggested that the methods were complementary rather than antagonistic  
270 (Additional file 12). Approximately 10% (long-read: 19 out of 188 pairs; short-read: 6 out of  
271 109) of the host-viral contig associations had supporting evidence from both PacBio read  
272 alignments and Hi-C intercontig links. In nearly all highly-connected viral contig pairs (greater  
273 than two additional contig associations) we observed evidence of host specificity from both  
274 methods even if it was for different host contigs. We also identified a bias in the host-viral family  
275 associations, where putative hosts for the Myoviridae were more likely to be identified via Hi-C  
276 than other viral families (Fig 4a). Myoviridae family viral specificity for the sulfur-reducing  
277 *Desulfovibrio* and the sulfur-oxidizing *Sulfurovum* genera were primarily identified through Hi-C  
278 contig links (Fig 4a, box: “Sulfur-degrading”). However, viral associations between the  
279 *Sutterella* and a previously unreported genera of rumen bacteria were primarily identified via  
280 PacBio read alignments and had little Hi-C intercontig link support.

281 We also tested the ability of longer read sequence data to resolve highly repetitive  
282 bacterial defense system target motif arrays, such as those produced by the CRISPR-Cas system,  
283 in our dataset. Despite having less than one third of the coverage of the short-read dataset, our  
284 long-read assembly contained two of the three large CRISPR arrays (consisting of 105 and 115  
285 spacers, respectively) in our combined assembly dataset (Fig 5a). The short-read dataset (597  
286 CRISPR arrays) contained approximately five-fold more identifiable CRISPR arrays than the  
287 long-read dataset (122 arrays), which is commensurate with the difference in the size of each  
288 assembly (5 Gbp vs 1 Gbp, respectively).

### 289 **Antimicrobial resistance gene detection**

290 Due to the frequent use of antibiotics in livestock production systems to treat disease and  
291 improve production, we wanted to assess the utility of longer-reads in detecting novel ARG  
292 alleles in assembled microbial genomes (Fig 5b). The long-read assembly (ARG allele count: 94)  
293 was found to contain over an order of magnitude more identifiable ARG alleles than the short-  
294 read assembly (ARG allele count: 7), despite the major coverage discrepancies between the two  
295 datasets. The major contributor to this discrepancy was found in the Tetracycline resistance gene  
296 class, as the long-read assembly contained 80 ribosomal protection and 3 efflux ARGs that are

297 predicted to confer tetracycline resistance. By contrast, only 2 ribosomal and 2 efflux Tetracycline  
298 ARGs were identified in the short-read assembly. Using the contigs containing these ARG alleles  
299 as anchors in our alignment of Hi-C read pairs, we attempted to identify horizontal transfer of  
300 these alleles using Hi-C intercontig link signal (Additional file 1: Supplementary Methods). We  
301 identified clusters of *Prevotella* bins, and clusters of bins from the Clostridiales and  
302 Bacteroidales that higher contig-link density with ARG allele contigs in our dataset (Additional  
303 file 1 : Figure S6; Additional file 13). These associations may represent potential horizontal  
304 transfer of these alleles; however, we note that inter-contig link density was relatively low in our  
305 comparisons (average alignments density was less than 2 reads per pair) and that ambiguous  
306 alignment to orthologous sequence could present false-positive signal in this analysis.

## 307 **Discussion**

308 Whole metagenome shotgun sequencing and assembly has often relied exclusively on  
309 short-read technologies due to the cost-effectiveness of the methods and the higher throughput  
310 that they provide. While such strategies are often able to efficiently generate sufficient read  
311 depth coverage to assemble fragments of organisms in the community, we demonstrate that  
312 biases inherent in singular technologies suitable for metagenome assembly result in an  
313 incomplete assembly/binning of the actual community. For example, we exclusively assembled a  
314 member of the Archaeal order *Thermoplasmatales* in our short-read dataset and a member of the  
315 Archaeal genus *Methanobrevibacter* in the long-read assembly. Several taxonomic studies using  
316 short-read 16S-based methods have shown that the CO<sub>2</sub>-reducing *Methanobrevibacter* are one of  
317 the most abundant genera of methanogenic Archaea in the rumen (29), which was not reflected  
318 in our short-read assembly dataset despite higher depths of coverage. Conversely, we found that  
319 the short-read assembly was better at resolving genomic fragments of the Eukaryotic  
320 Superkingdom, which were relatively underrepresented in the long-read assembly. Given that we  
321 sequenced the same biological sample in all of our analyses, these discrepancies suggest that  
322 each technology samples different portions of the rumen microbial community. Our data suggest  
323 that each technology's unique purview can be attributed to compositional differences of the  
324 genomes among taxonomic superkingdoms (Fig 1c), genomic GC% (Fig 1b), and the presence of  
325 mobile DNA (Fig 4, Additional file 1: Figure S6).

326 We identified a GC% bias in our short-read data relative to our long-read reads; however,  
327 this relative bias was reversed in comparisons of the GC content of the final assemblies, where  
328 our short-read assembly had more -- albeit shorter -- assembled contigs in lower GC% tranches  
329 (Fig 1b). These differences are most likely due to the different error rates and degrees of  
330 coverage of reads from the two sequencing technologies and the algorithms used by the different  
331 assembly programs to correct for errors. Paradoxically, the short-read assembly sampled  
332 proportionally fewer reads at higher and lower GC tranches, but was able to incorporate even  
333 fragmentary information from these tranches into smaller contigs. The long-read assembly, by  
334 contrast, required sufficient coverage of reads to appropriately correct for errors and this meant  
335 that many lower GC% reads were discarded due to assembly constraints, as we demonstrate in  
336 our read alignment overlap analysis (Additional file 1: Figure S1). Protists may represent a large  
337 proportion of this lower GC% community, and their genomes likely consist of highly repetitive  
338 sequence that would require higher depths of long-read coverage to sufficiently traverse (20).  
339 The use of improved error-correction methods or circular-consensus sequence reads (30,31) are  
340 likely to provide substantial benefits for downstream annotation and may enable the assembly of  
341 the low-abundance, low-GC% species that were poorly represented in our long-read assembly.  
342 Regardless, we found that even a lower depth of coverage of high error-rate long-reads better  
343 resolved biological features in the highly abundant strains than those detected in our short-read  
344 assembly.

345 We identified many biological features in our sample that would be missed if only a  
346 single technology/method was used for each step of the assembly, binning and analysis of our  
347 dataset. While differences in DNA sequencing technology represented a far smaller proportion of  
348 the total missing sequence (~ 0.5%) in our pairwise comparison, the missing fraction consisted of  
349 relatively large contigs with SCGs suitable for binning, as well as 7,886 complete ORFs. Larger  
350 contigs in the long-read dataset also resulted in a higher average count of annotated ORFs per  
351 contig than the short-read dataset by a factor of seven. This contiguity of gene regions is  
352 particularly important in bacterial classification, where functional genes of particular classes can  
353 be arranged in complete and phased operons. It is highly likely that this increase in contiguity  
354 contributed to the massive discrepancy in ARG allele identification between the two assemblies.  
355 We noted a significant increase in detected Tetracycline resistance alleles in our long-read  
356 assembly of a rumen metagenome from a concentrate-fed animal, which contradicts previous

357 work using short-read assemblies that found that animals fed concentrates should have few  
358 Tetracycline resistance alleles (32). Calves in the sampled research herd (UW-Madison, Dairy  
359 Forage Research Center) are given Chlortetracycline during inclement weather and Tetracycline  
360 is applied topically to heel warts on adult animals. It is possible that incidental/early exposure to  
361 this antibiotic has enabled the proliferation of tetracycline resistance alleles in the rumen  
362 community, and this proliferation was only detected in our long-read assembly. Previous studies  
363 have demonstrated the benefit of using longer reads in ARG allele –associated satellite DNA  
364 tracking (33) and ARG allele amplicon sequencing (34). To our knowledge, this is the first  
365 survey to identify the benefits of long-reads in de novo assembly of ARG alleles from a complex  
366 metagenomics sample.

367 We also identified discrepancies between our selected computational (MetaBat) and  
368 proximity ligation (ProxiMeta Hi-C) binning methods that suggest that a combination of binning  
369 techniques are needed to identify all complete MAGs in a metagenomic sample. Contig binning  
370 comparisons suggest that MetaBat successfully binned contigs from the low-GC% contig  
371 tranches; however, it failed to incorporate the same proportion of smaller contigs in bins from the  
372 short-read (< 2,500 bp) or long-read (< 10,000 bp) assemblies as the ProxiMeta method. Smaller  
373 contigs most likely result from low-sequencing coverage regions or high copy orthologous  
374 genomic segments in a metagenomic sample. Both of these problems may have confounded the  
375 tetranucleotide frequency and coverage depth estimates used by MetaBat to bin our contigs,  
376 resulting in their lower frequencies in that binset. We did note some issues in DAS\_tool  
377 dereplication of our dataset, where DAS\_tool may have aggressively pruned contigs from  
378 MetaBat bins. However, our data suggests that MetaBat may have included far more  
379 contamination due to cross-Kingdom SCGs, thereby resulting in this aggressive filtration.

380 In order to identify the horizontal transfer of mobile DNA in the rumen, we exploited two  
381 technologies to identify candidate hosts for transferred ARG alleles and assembled viral contigs.  
382 We observed inter-contig link associations between ARG allele contigs and bins that consisted of  
383 species from the Clostridiales and Bacteroidales. Evidence of identical ARG allele orthologs  
384 belonging to both classes was previously found in human colon samples (35); however, we note  
385 that our analysis shows only a precursory association of the context of identified ARG alleles  
386 and prospective host bins. We were unable to identify the exact vector that may enable the cross-

387 species transfer of several of these alleles, but we suspect that lateral transfer of ARG alleles may  
388 be an adaptation of rumen bacterial species against antibiotic challenge as noted above. Direct  
389 evidence of the horizontal transfer of mobile elements was observed in identified novel host-viral  
390 associations that we detected by using a combination of PacBio long-read alignments and Hi-C  
391 intercontig link analysis. Proximity ligation has been previously used to detect host-virus  
392 associations (36); however, our combination of technologies potentially reveals new insights in  
393 the biology of the interaction between host and phage. We found a clear preference between the  
394 two methods in the detection of viral family classes, with Hi-C intercontig links preferring the  
395 Myoviridae viral family and our PacBio read alignments preferring all other viral families. This  
396 preference may reflect the nature of the activity of these viruses, as some genera of the  
397 Myoviridae family are known to have short lytic cycles (37) as opposed to long-term lysogenic  
398 life-cycles found in other viral families. We also identified viral-host association with several  
399 contigs within bins identified as belonging to the *Desulfovibrio* and *Sulfurovum* genera. Viral  
400 auxiliary metabolic genes related to sulfur metabolism were previously identified in assembly of  
401 rumen viral populations (28), and our study may provide a link to the putative origins of these  
402 auxiliary genes in host genomes that are known to metabolise sulfur compounds. We identified  
403 two ORFs annotated as 3'-Phosphoadenosine-5'-phosphosulfate (PAPS) genes in a viral contig in  
404 the long-read assembly that was associated with host contigs assigned to the *Dehalococcoides*.  
405 We did not detect any auxiliary metabolic genes in the short-read assembly. Additionally, the  
406 short-read assembly served as the basis of fewer host-viral contig associations in both Hi-C and  
407 PacBio read analyses, suggesting that assembled short-read viral contigs may have been too  
408 small or redundant to provide a useful foundation for alignment-based associations.

409 We recommend that future surveys of complex metagenomic communities include a  
410 combination of different DNA sequencing technologies and conformational capture techniques  
411 (ie. Hi-C) in order to best resolve the unique biological features of the community. If our analysis  
412 was restricted to the use of the short-read WGS data and one computational binning technique  
413 (MetaBat), we would have missed 139 out of 250 of the top dereplicated DAS\_Tool short-read  
414 bins contributed by ProxiMeta binning. Our long-read dataset further contributed 7,886 complete  
415 ORFs, 97 ARG alleles and 188 host-virus associations, with Hi-C signal providing further  
416 evidence of host-virus associations. We demonstrate that even a small proportion of long-reads  
417 can contribute high quality metagenome bins, and that the long-read data provided by the

418 technology is suitable for uncovering candidate mobile DNA in the sample. We also note that the  
419 inclusion of a computational binning method (Metabat) with a physical binning technique  
420 (ProxiMeta; Hi-C) further increased our count of high quality, DAS\_Tool dereplicated bins,  
421 likely due to each method sampling a different pool of organisms. Therefore, the DAS\_Tool  
422 dereplication of both sets of bins increased our final counts of high quality (> 80% completion)  
423 bins by 30-60% in the long-read and short-read assemblies. If a metagenomics WGS survey is  
424 cost-constrained, our data suggests that a computational method, such as MetaBat, currently  
425 cannot fully compensate for the GC% bias and repetitive, orthologous DNA issues that could  
426 reduce the completeness of a downstream short-read assembly. Still, we suspect that such  
427 projects will be able to assemble and characterize the abundant, moderate-GC portion of the  
428 metagenome community sufficiently for analysis.

429 Further refinements could improve characterization of the rumen microbial community  
430 and other complex metagenomic communities in general. For example, microbes present in low  
431 abundance (or transient species) still represent a challenge to all of the technologies used in our  
432 survey. A sample fractionation method similar to one used by Solden et al. (38) would enable  
433 better, targeted coverage of these communities in future surveys while losing the ability to  
434 determine relative abundance estimates for strains. In the absence of targeted sample enrichment,  
435 co-assembly with other sampled datasets (17), low-error rate long-reads (31) or real-time,  
436 selective read sequencing (39) would enable sampling of lower abundant strains. Additionally,  
437 there is a need for a rigorous method to combine and/or scaffold metagenome assemblies with  
438 high-error long-reads. Our attempts to combine our short-read and long-read datasets using  
439 existing scaffolding and assembly software failed to produce a significant improvement in  
440 assembly contiguity and quality. The complexity of the data will likely require a specialized  
441 solution that can also resolve issues that result from excessive strain heterogeneity.

## 442 **Conclusions**

443 We demonstrate the benefits of using multiple sequencing technologies and proximity  
444 ligation in identifying unique biological facets of the cattle rumen metagenome and we present  
445 data that suggests that each has a unique niche in downstream analysis. Our comparison  
446 identified biases in the sampling of different portions of the community by each sequencing  
447 technology (e.g. bias in GC% representation), suggesting that a singular DNA sequencing

448 technology is insufficient to characterize complex metagenomic samples. Using a combination of  
449 long-read alignments and proximity ligation, we identified putative hosts for assembled  
450 bacteriophage at a resolution previously unreported in other rumen surveys. These host-phage  
451 assignments support previous work that revealed increased viral predation of sulfur-metabolising  
452 bacterial species; however, we were able to provide a higher resolution of this association,  
453 identify potential auxiliary metabolic genes related to sulfur metabolism, and identify phage that  
454 may target a diverse range of different bacterial species. Furthermore, we found evidence to  
455 support that these viruses have a lytic lifecycle due to a higher proportion of Hi-C inter-contig  
456 link association data in our analysis. Finally, it appears that there may be a high degree of mobile  
457 DNA that was heretofore uncharacterized in the rumen, and that this mobile DNA may be  
458 shuttling antimicrobial resistance gene alleles among distantly related species. These unique  
459 characteristics of the rumen microbial community would be difficult to detect without the use of  
460 several different methods and techniques that we have refined in this study, and we recommend  
461 that future surveys incorporate these techniques to further characterize complex metagenomic  
462 communities.

463

## 464 **Methods**

### 465 **Sample selection, DNA extraction and Hi-C library preparation**

466 Rumen contents from one multiparous Holstein cow housed at the University of  
467 Wisconsin, Madison, campus were sampled via rumen cannula as previously described (40). The  
468 sampled cow was in a later period of lactation and was being fed a total mixed ration. Rumen  
469 solids and liquids were combined in a 1:1 volume mix, and then were agitated using a blender  
470 with carbon dioxide gas infusion as previously described (40). DNA was extracted via the  
471 protocols of Yu and Morrison (41) albeit with several modifications to the protocol to increase  
472 yield. To improve DNA precipitation, an increased volume of 10 M ammonium acetate (20% of  
473 the supernatant volume) was added. Additionally, DNA pellets were not vacuum dried so as to  
474 reduce the potential for single-strand nicking due to dehydration. DNA quality was assessed via  
475 Fragment Analyzer spectra and spectrophotometric assays.



476 Different DNA extraction methods can result in substantial observed differences in  
477 strain- and species-level assignments depending on the recalcitrance of the cell wall of individual  
478 cells (8). However, contemporary long-read sequencing platforms require input DNA to be  
479 devoid of single-strand nicks in order to maximize sequence read lengths (42). Indeed, our  
480 observed, average subread length for the long-read dataset was almost half ( $7,957 \pm 4,957$  bp)  
481 the size of our original Fragment Analyzer spectra peaks ( $\sim 14,651$  bp), suggesting that the  
482 bacterial cell lysis still impacted DNA molecule integrity (Additional file 1 : Figure S8).  
483 Regardless, the average subread length was 9 kb and we were able to sequence a total of 52.92  
484 gigabases of raw PacBio data for our downstream analysis. .

485 Portions of the rumen contents samples were fixed by a low concentration formaldehyde  
486 solution before DNA extraction as previously described (43). Fixed samples were subject to the  
487 same DNA extraction protocol as listed above, processed by Phase Genomics (Seattle, WA) and  
488 sequenced on a HiSeq 2000.

#### 489 **Long-read and short-read DNA sequencing**

490 Tru-seq libraries were created from whole DNA preps for the sample as previously  
491 described (44). Samples were run on a single Illumina NextSeq500 flowcell using a 300 cycle  
492 SBS kit to produce 150 bp by 150 bp paired-end reads.

493 DNA samples from each cow were size selected to a 6 kb fragment length cutoff using a  
494 Blue Pippin (Sage Science; Beverly, MA). Libraries for SMRT sequencing were created as  
495 previously described (6) from the size-selected DNA samples. We generated 7.57 and 45.35 Gbp  
496 of PacBio uncorrected reads using the PacBio RSII (8 cells) and PacBio Sequel (21 cells),  
497 respectively. A total of 52.92 Gbp of subread bases with an average read length of 6623.33 bp  
498 were generated on all samples using PacBio sequencers (Additional file 1 : Table S14).

#### 499 **Genome assembly and binning**

500 PacBio raw reads were assembled by Canu v1.6+101 changes (r8513). We ran five  
501 rounds of correction to try to recover lower-coverage reads for assembly using the parameters “-  
502 correct corMinCoverage=0 genomeSize=5m corOutCoverage=all corMhapSensitivity=high”.  
503 The input for each subsequent round were the corrected reads from the previous step. Finally,  
504 the assembly was generated via the parameters “-trim-assemble genomeSize=5m

505 oeaMemory=32 redMemory=32 correctedErrorRate=0.035". The assembly was successively  
506 polished twice with Illumina data using Pilon restricted to fix indel errors using the "-fix indels"  
507 and "-nostrays" parameters. Pilon correction was automated using the  
508 slurmPilonCorrectionPipeline.py script available at the following repository:  
509 <https://github.com/njdbickhart/RumenLongReadASM> . We generated a second set of PacBio  
510 corrected reads for the viral-association and GC-read overlap analyses using the options "--correct  
511 corMinCoverage=0 genomeSize=5m corOutCoverage=all corMhapSensitivity=high  
512 corMaxEvidenceCoverageLocal=10 corMaxEvidenceCoverageGlobal=10" to restrict the global  
513 filter to avoid over-smashing similar sequences during correction. Illumina reads were assembled  
514 using MegaHit v1.1.2 using parameters --continue --kmin-1pass -m 15e+10 --presets meta-large  
515 --min-contig-len 1000 -t 16 and otherwise default settings.

516 Reads from other rumen WGS datasets (Additional file 1 : Table S15) were aligned to  
517 assembled contigs from both assemblies with BWA MEM(45) and were used in Metabat2  
518 binning(21). Metabat2 was run with default settings using the coverage estimates from all rumen  
519 WGS datasets (Additional file 1 : Supplementary methods). Hi-C reads were aligned to  
520 assembled contigs from both assemblies using BWA MEM (45) with options -5S, and contigs  
521 were clustered using these alignments in the Phase Genomics ProxiMeta analysis suite(43). We  
522 noted a difference in bin contamination between the two methods, where Metabat tended to have  
523 more bins with greater than 10% CheckM(46) Contamination (76 out of 1347 short-read bins)  
524 compared to the ProxiMeta bins (29 out of 3,664 bins; Chi-Squared  $p < 0.001$ ).

525 Using the ProxiMeta and MetaBat bin assignments as a seed, we consolidated assembly  
526 bins for each assembly using the DAS\_Tool pipeline (23). The dereplication algorithm of  
527 DAS\_Tool modifies input bin composition in an iterative, but deterministic, fashion, so we also  
528 validated the quality of our input bins by using CheckM (46) quality metrics in addition to the  
529 DAS\_Tool SCG metrics (Fig 2c, 2d). We noted some discrepancies in the CheckM quality  
530 metrics and those estimated by DAS\_Tool for our input and dereplicated MetaBat bins,  
531 respectively (Additional file 1: Figure S9, S10). CheckM tended to overestimate the quality of  
532 MetaBat input bins and dereplicated bins in each assembly, which may have due to the inclusion  
533 of proportionally more cross-Kingdom SCGs in the MetaBat bins as assessed by DAS\_Tool. As  
534 a result, DAS\_Tool dereplication was far more permissive at removing bins from our MetaBat

535 dataset (average 69 +/- 204 contigs removed per bin) than our ProxiMeta dataset (average 23 +/-  
536 30 contigs) in our short-read dataset. For further details on assembly binning and bin  
537 dereplication, please see Additional file 1: Supplementary Methods.

### 538 **Assembly statistics and contaminant identification**

539 General contig classification and dataset statistics were assessed using the Blobtools  
540 pipeline (24). To generate read coverage data for contig classification, paired-end short read  
541 datasets from 16 SRA datasets and the Illumina sequence data from this study were aligned to  
542 each contig and used in subsequent binning and contaminant identification screens. For a full list  
543 of datasets and accessions used in the cross-genome comparison alignments, please see  
544 Additional file 1 : Table S15. Assembly coverage and contig classifications were visually  
545 inspected using Blobtools (24). Comparisons between assembled contigs and other cattle-  
546 associated WGS metagenomics datasets were performed by using MASH (47) sketch profile  
547 operations and minimap2(48) alignments. Datasets were sketched in MASH by using a kmer size  
548 (-k) of 21 with a sketch size of 10,000 (-s). Minimap2 alignments were performed using the  
549 “asm5” preset configuration. DIAMOND (49) alignment using the Uniprot reference proteomes  
550 database (release: 2017\_07) was used to identify potential taxonomic affiliation of contigs  
551 through the Blobtools metagenome analysis workflow (24). MAGpy (50) was also used to  
552 suggest putative names for the short and long read bins. CheckM (46) version 1.0.11 was used to  
553 assess bin contamination and completeness separately from the DAS\_Tool SCG quality metrics.

### 554 **ORF prediction, gene annotation and taxonomic affiliation**

555 Open reading frames were identified by Prodigal (25) (v 2.6.3) as part of the DAS\_Tool  
556 pipeline. Gene ontology (GO) term assignment was performed using the EggnoG-mapper  
557 pipeline (51) using the same Diamond input alignments used in the Blobtools analysis.  
558 Assembly bin functional classification was determined using the FAPROTAX workflow (52),  
559 using the Uniprot/Diamond/Blobtools-derived taxonomy of each contig. In order to deal with  
560 uncertain species-level classifications for previously unassembled strains, taxonomic affiliations  
561 were agglomerated at the genus level for dendrogram construction. The reference tree was  
562 created from NCBI Common Tree (<https://www.ncbi.nlm.nih.gov/Taxonomy/CommonTree/wwwcmt.cgi>) and plotted  
563 in the R package ggtree (53).

## 564 **Viral-host association prediction and Hi-C intercontig link analysis**

565 In order to identify potential virus-host links, we used a direct long-read alignment  
566 strategy (PacBio alignment) and a Hi-C intercontig link analysis (Hi-C). Briefly, contigs  
567 identified as being primarily viral in-origin from the Blobtools workflow were isolated from the  
568 short-read and long-read assemblies. These contigs were then used as the references in an  
569 alignment of the error-corrected PacBio reads generated in our second round of Canu correction  
570 (please see the “Genome Assembly and Binning” section above). We used Minimap2 to align the  
571 PacBio dataset to the viral contigs from both datasets using the “map-pb” alignment preset.  
572 Resulting alignment files (“paf”) were subsequently filtered using the  
573 “selectLikelyViralOverhangs.pl” script, to selectively identify PacBio read alignments that  
574 extend beyond the contig’s borders. We then used the trimmed, unaligned portions of these reads  
575 in a second alignment to the entire assembly to identify putative host contigs (Additional file 1 :  
576 Supplementary methods). A viral-host contig pair was only identified if two or more separate  
577 reads aligned to the same viral/non-viral contig pair in any orientation.

578 Hi-C intercontig link associations were identified from read alignments of the Hi-C data  
579 to each respective assembly. BAM files generated from BWA alignments of Hi-C reads to the  
580 assemblies were reduced to a bipartite, undirected graph of inter-contig alignment counts. The  
581 graph was filtered to identify only inter-contig links that involved viral contigs and that had  
582 greater than 20 or 10 observations in the long-read and short-read assembly, respectively. The  
583 information from both methods was combined in a qualitative fashion using custom scripts  
584 (Additional file 1 : Supplementary methods). The resulting dataset was visualized using  
585 Cytoscape(54) with the default layout settings, or the “attribute circle” layout option depending  
586 on the degrees of viral-contig associations that needed to be visually represented.

## 587 **CRISPR-CAS spacer detection and ARG detection**

588 ARG homologues were identified using BLASTN with the nucleotide sequences  
589 extracted from the Prodigal ORFs locations as a query against the transferrable ARG ResFinder  
590 database (55). Hits with a minimum 95% nucleotide sequence identity and 90% ARG sequence  
591 coverage were retained as candidate ARGs. Hi-C linker analysis identifying ARG gene contig-  
592 associations was derived from Proximeta bin data and Hi-C read alignments by counting the  
593 number of read pairs connecting contigs in each bin to each ARG. The procedure for identifying

594 these associations was similar to the protocol used to identify Hi-C-based, Viral-Host  
595 associations. Briefly, a bipartite, undirected graph of inter-contig alignment counts was filtered  
596 to contain only associations originating from contigs that contained ARG alleles and had hits to  
597 non-ARG-containing contigs. This graph was then converted into a matrix of raw association  
598 counts, which were then analyzed using the R statistical language (version 3.4.4). Taxonomic  
599 affiliations of contigs were derived from Blobtools, whereas the taxonomic affiliations of AN  
600 bins were derived from ProxiMeta MASH (47) and CheckM(46) analysis.

### 601 **Ethics approval and consent to participate**

602 All animal work was approved by the University of Wisconsin-Madison Institutional  
603 Animal Care and Use Committee under protocol A005590-A04. Research was conducted under  
604 an IACUC approved protocol in compliance with the Animal Welfare Act, PHS Policy, and  
605 other Federal statutes and regulations relating to animals and experiments involving animals. The  
606 facility where this research was conducted is accredited by the Association for Assessment and  
607 Accreditation of Laboratory Animal Care, International and adheres to principles stated in the  
608 Guide for the Care and Use of Laboratory Animals, National Research Council, 2011.

609

### 610 **Availability of data and materials**

611 The datasets generated and/or analysed during the current study are available in the NCBI SRA  
612 repository under Bioproject: PRJNA507739. The assemblies, bins and other supplementary data  
613 are available at this URL: [https://obj.umiacs.umd.edu/marbl\\_publications/rumen/index.html](https://obj.umiacs.umd.edu/marbl_publications/rumen/index.html) . A  
614 description of commands, scripts and other materials used to analyze the data in this project can  
615 be found in the following GitHub repository:

616 <https://github.com/njdbickhart/RumenLongReadASM>

617

### 618 **References**

- 619 1. Li D, Liu C-M, Luo R, Sadakane K, Lam T-W. MEGAHIT: an ultra-fast single-node solution  
620 for large and complex metagenomics assembly via succinct de Bruijn graph. *Bioinforma*  
621 *Oxf Engl*. 2015 May 15;31(10):1674–6.
- 622 2. Nurk S, Meleshko D, Korobeynikov A, Pevzner PA. metaSPAdes: a new versatile

- 623 metagenomic assembler. *Genome Res.* 2017;27(5):824–34.
- 624 3. Sczyrba A, Hofmann P, Belmann P, Koslicki D, Janssen S, Droege J, et al. Critical  
625 Assessment of Metagenome Interpretation – a benchmark of computational metagenomics  
626 software. *bioRxiv.* 2017 Jan 9;099127.
- 627 4. Nagarajan N, Pop M. Sequence assembly demystified. *Nat Rev Genet.* 2013 Mar;14(3):157–  
628 67.
- 629 5. Awad S, Irber L, Brown CT. Evaluating Metagenome Assembly on a Simple Defined  
630 Community with Many Strain Variants. *bioRxiv.* 2017 Jul 3;155358.
- 631 6. Pendleton M, Sebra R, Pang AWC, Ummat A, Franzen O, Rausch T, et al. Assembly and  
632 diploid architecture of an individual human genome via single-molecule technologies. *Nat*  
633 *Methods.* 2015 Aug;12(8):780–6.
- 634 7. Bickhart DM, Rosen BD, Koren S, Sayre BL, Hastie AR, Chan S, et al. Single-molecule  
635 sequencing and chromatin conformation capture enable de novo reference assembly of the  
636 domestic goat genome. *Nat Genet.* 2017 Apr;49(4):643–50.
- 637 8. Henderson G, Cox F, Kittelmann S, Miri VH, Zethof M, Noel SJ, et al. Effect of DNA  
638 extraction methods and sampling techniques on the apparent structure of cow and sheep  
639 rumen microbial communities. *PloS One.* 2013;8(9):e74787.
- 640 9. Tsai Y-C, Conlan S, Deming C, Segre JA, Kong HH, Korlach J, et al. Resolving the  
641 Complexity of Human Skin Metagenomes Using Single-Molecule Sequencing. *mBio*  
642 [Internet]. 2016 Feb 9;7(1). Available from:  
643 <https://www.ncbi.nlm.nih.gov/pmc/articles/PMC4752602/>
- 644 10. Brown BL, Watson M, Minot SS, Rivera MC, Franklin RB. MinION™ nanopore sequencing  
645 of environmental metagenomes: a synthetic approach. *GigaScience.* 2017 01;6(3):1–10.
- 646 11. Watson M. Mind the gaps - ignoring errors in long read assemblies critically affects protein  
647 prediction. *bioRxiv.* 2018 Mar 19;285049.
- 648 12. Weimer PJ. Redundancy, resilience, and host specificity of the ruminal microbiota:  
649 implications for engineering improved ruminal fermentations. *Front Microbiol* [Internet].  
650 2015 Apr 10 [cited 2016 Oct 18];6. Available from:  
651 <http://www.ncbi.nlm.nih.gov/pmc/articles/PMC4392294/>
- 652 13. Mohammed R, Brink GE, Stevenson DM, Neumann AP, Beauchemin KA, Suen G, et al.  
653 Bacterial communities in the rumen of Holstein heifers differ when fed orchardgrass as

- 654 pasture vs. hay. *Front Microbiol.* 2014;5:689.
- 655 14. Jewell KA, McCormick CA, Odt CL, Weimer PJ, Suen G. Ruminant Bacterial Community  
656 Composition in Dairy Cows Is Dynamic over the Course of Two Lactations and Correlates  
657 with Feed Efficiency. *Appl Environ Microbiol.* 2015 Jul 15;81(14):4697–710.
- 658 15. Dill-McFarland KA, Breaker JD, Suen G. Microbial succession in the gastrointestinal tract of  
659 dairy cows from 2 weeks to first lactation. *Sci Rep [Internet].* 2017 Jan 18 [cited 2017 May  
660 10];7. Available from: <http://www.ncbi.nlm.nih.gov/pmc/articles/PMC5241668/>
- 661 16. Hess M, Sczyrba A, Egan R, Kim T-W, Chokhawala H, Schroth G, et al. Metagenomic  
662 Discovery of Biomass-Degrading Genes and Genomes from Cow Rumen. *Science.* 2011  
663 Jan 28;331(6016):463–7.
- 664 17. Stewart RD, Auffret MD, Warr A, Wisner AH, Press MO, Langford KW, et al. Assembly of  
665 913 microbial genomes from metagenomic sequencing of the cow rumen. *Nat Commun.*  
666 2018 Feb 28;9(1):870.
- 667 18. Seshadri R, Leahy SC, Attwood GT, Teh KH, Lambie SC, Cookson AL, et al. Cultivation  
668 and sequencing of rumen microbiome members from the Hungate1000 Collection. *Nat*  
669 *Biotechnol [Internet].* 2018 Mar 19 [cited 2018 Apr 4]; Available from:  
670 <https://www.nature.com/articles/nbt.4110>
- 671 19. Brownlee AG. Remarkably AT-rich genomic DNA from the anaerobic fungus  
672 *Neocallimastix.* *Nucleic Acids Res.* 1989 Feb 25;17(4):1327–35.
- 673 20. Li X-Q, Du D. Variation, Evolution, and Correlation Analysis of C+G Content and Genome  
674 or Chromosome Size in Different Kingdoms and Phyla. *PLoS ONE [Internet].* 2014 Feb 13  
675 [cited 2018 Sep 11];9(2). Available from:  
676 <https://www.ncbi.nlm.nih.gov/pmc/articles/PMC3923770/>
- 677 21. Kang DD, Froula J, Egan R, Wang Z. MetaBAT, an efficient tool for accurately  
678 reconstructing single genomes from complex microbial communities. *PeerJ [Internet].* 2015  
679 Aug 27 [cited 2017 Apr 10];3. Available from:  
680 <http://www.ncbi.nlm.nih.gov/pmc/articles/PMC4556158/>
- 681 22. Burton JN, Liachko I, Dunham MJ, Shendure J. Species-Level Deconvolution of  
682 Metagenome Assemblies with Hi-C–Based Contact Probability Maps. *G3 Genes Genomes*  
683 *Genet.* 2014;4(7):1339–1346.
- 684 23. Sieber CMK, Probst AJ, Sharrar A, Thomas BC, Hess M, Tringe SG, et al. Recovery of

- 685 genomes from metagenomes via a dereplication, aggregation and scoring strategy. Nat  
686 Microbiol. 2018 Jul;3(7):836–43.
- 687 24. Laetsch DR, Blaxter ML. BlobTools: Interrogation of genome assemblies. F1000Research.  
688 2017 Jul 31;6:1287.
- 689 25. Hyatt D, Chen G-L, LoCascio PF, Land ML, Larimer FW, Hauser LJ. Prodigal: prokaryotic  
690 gene recognition and translation initiation site identification. BMC Bioinformatics. 2010  
691 Mar 8;11:119.
- 692 26. Fouts DE. Phage\_Finder: Automated identification and classification of prophage regions in  
693 complete bacterial genome sequences. Nucleic Acids Res. 2006 Nov 1;34(20):5839–51.
- 694 27. Zimin AV, Puiu D, Luo M-C, Zhu T, Koren S, Marçais G, et al. Hybrid assembly of the large  
695 and highly repetitive genome of *Aegilops tauschii*, a progenitor of bread wheat, with the  
696 MaSuRCA mega-reads algorithm. Genome Res. 2017 May;27(5):787–92.
- 697 28. Anderson CL, Sullivan MB, Fernando SC. Dietary energy drives the dynamic response of  
698 bovine rumen viral communities. Microbiome. 2017 Nov 28;5(1):155.
- 699 29. Paul SS, Deb SM, Dey A, Somvanshi SPS, Singh D, Rathore R, et al. 16S rDNA analysis of  
700 archaea indicates dominance of Methanobacterium and high abundance of  
701 Methanomassiliicoccaceae in rumen of Nili-Ravi buffalo. Anaerobe. 2015 Oct;35(Pt B):3–  
702 10.
- 703 30. Frank JA, Pan Y, Tooming-Klunderud A, Eijsink VGH, McHardy AC, Nederbragt AJ, et al.  
704 Improved metagenome assemblies and taxonomic binning using long-read circular  
705 consensus sequence data. Sci Rep. 2016 May 9;6:25373.
- 706 31. Wagner J, Coupland P, Browne HP, Lawley TD, Francis SC, Parkhill J. Evaluation of  
707 PacBio sequencing for full-length bacterial 16S rRNA gene classification. BMC Microbiol  
708 [Internet]. 2016 Nov 14 [cited 2018 Nov 6];16. Available from:  
709 <https://www.ncbi.nlm.nih.gov/pmc/articles/PMC5109829/>
- 710 32. Auffret MD, Dewhurst RJ, Duthie C-A, Rooke JA, John Wallace R, Freeman TC, et al. The  
711 rumen microbiome as a reservoir of antimicrobial resistance and pathogenicity genes is  
712 directly affected by diet in beef cattle. Microbiome. 2017 Dec 11;5(1):159.
- 713 33. Conlan S, Thomas PJ, Deming C, Park M, Lau AF, Dekker JP, et al. Single-molecule  
714 sequencing to track plasmid diversity of hospital-associated carbapenemase-producing  
715 Enterobacteriaceae. Sci Transl Med. 2014 Sep 17;6(254):254ra126-254ra126.



- 716 34. Urbaniak C, Sielaff AC, Frey KG, Allen JE, Singh N, Jaing C, et al. Detection of  
717 antimicrobial resistance genes associated with the International Space Station  
718 environmental surfaces. *Sci Rep*. 2018 Jan 16;8(1):814.
- 719 35. Shoemaker NB, Vlamakis H, Hayes K, Salyers AA. Evidence for Extensive Resistance Gene  
720 Transfer among *Bacteroides* spp. and among *Bacteroides* and Other Genera in the Human  
721 Colon. *Appl Env Microbiol*. 2001 Feb 1;67(2):561–8.
- 722 36. Marbouty M, Baudry L, Cournac A, Koszul R. Scaffolding bacterial genomes and probing  
723 host-virus interactions in gut microbiome by proximity ligation (chromosome capture)  
724 assay. *Sci Adv* [Internet]. 2017 Feb 17 [cited 2018 Nov 27];3(2). Available from:  
725 <https://www.ncbi.nlm.nih.gov/pmc/articles/PMC5315449/>
- 726 37. Zhou W, Feng Y, Zong Z. Two New Lytic Bacteriophages of the Myoviridae Family Against  
727 Carbapenem-Resistant *Acinetobacter baumannii*. *Front Microbiol* [Internet]. 2018 [cited  
728 2018 Nov 26];9. Available from:  
729 <https://www.frontiersin.org/articles/10.3389/fmicb.2018.00850/full>
- 730 38. Solden LM, Naas AE, Roux S, Daly RA, Collins WB, Nicora CD, et al. Interspecies cross-  
731 feeding orchestrates carbon degradation in the rumen ecosystem. *Nat Microbiol*. 2018  
732 Nov;3(11):1274.
- 733 39. Loose M, Malla S, Stout M. Real-time selective sequencing using nanopore technology. *Nat*  
734 *Methods*. 2016 Sep;13(9):751–4.
- 735 40. Stevenson DM, Weimer PJ. Dominance of *Prevotella* and low abundance of classical ruminal  
736 bacterial species in the bovine rumen revealed by relative quantification real-time PCR.  
737 *Appl Microbiol Biotechnol*. 2007 May;75(1):165–74.
- 738 41. Yu Z, Morrison M. Improved extraction of PCR-quality community DNA from digesta and  
739 fecal samples. *BioTechniques*. 2004 May;36(5):808–12.
- 740 42. Eid J, Fehr A, Gray J, Luong K, Lyle J, Otto G, et al. Real-time DNA sequencing from single  
741 polymerase molecules. *Science*. 2009 Jan 2;323(5910):133–8.
- 742 43. Press MO, Wiser AH, Kronenberg ZN, Langford KW, Shakya M, Lo C-C, et al. Hi-C  
743 deconvolution of a human gut microbiome yields high-quality draft genomes and reveals  
744 plasmid-genome interactions. *bioRxiv*. 2017 Oct 5;198713.
- 745 44. Bentley DR, Balasubramanian S, Swerdlow HP, Smith GP, Milton J, Brown CG, et al.  
746 Accurate whole human genome sequencing using reversible terminator chemistry. *Nature*.

- 747 2008 Nov 6;456(7218):53–9.
- 748 45. Li H, Durbin R. Fast and accurate short read alignment with Burrows-Wheeler transform.  
749 *Bioinforma Oxf Engl*. 2009 Jul 15;25(14):1754–60.
- 750 46. Parks DH, Imelfort M, Skennerton CT, Hugenholtz P, Tyson GW. CheckM: assessing the  
751 quality of microbial genomes recovered from isolates, single cells, and metagenomes.  
752 *Genome Res*. 2015 Jul;25(7):1043–55.
- 753 47. Ondov BD, Treangen TJ, Melsted P, Mallonee AB, Bergman NH, Koren S, et al. Mash: fast  
754 genome and metagenome distance estimation using MinHash. *Genome Biol*. 2016;17:132.
- 755 48. Li H. Minimap and miniasm: fast mapping and de novo assembly for noisy long sequences.  
756 *Bioinformatics*. 2016 Jul 15;32(14):2103–10.
- 757 49. Buchfink B, Xie C, Huson DH. Fast and sensitive protein alignment using DIAMOND. *Nat*  
758 *Methods*. 2015 Jan;12(1):59–60.
- 759 50. Stewart RD, Auffret M, Snelling TJ, Roehe R, Watson M. MAGpy: a reproducible pipeline  
760 for the downstream analysis of metagenome-assembled genomes (MAGs). *Bioinformatics*  
761 [Internet]. 2018 Nov 10 [cited 2018 Nov 27]; Available from:  
762 [https://academic.oup.com/bioinformatics/advance-](https://academic.oup.com/bioinformatics/advance-article/doi/10.1093/bioinformatics/bty905/5172363)  
763 [article/doi/10.1093/bioinformatics/bty905/5172363](https://academic.oup.com/bioinformatics/advance-article/doi/10.1093/bioinformatics/bty905/5172363)
- 764 51. Huerta-Cepas J, Forslund K, Coelho LP, Szklarczyk D, Jensen LJ, von Mering C, et al. Fast  
765 Genome-Wide Functional Annotation through Orthology Assignment by eggNOG-Mapper.  
766 *Mol Biol Evol*. 2017 Aug 1;34(8):2115–22.
- 767 52. Louca S, Parfrey LW, Doebeli M. Decoupling function and taxonomy in the global ocean  
768 microbiome. *Science*. 2016 Sep 16;353(6305):1272–7.
- 769 53. Yu G, Smith DK, Zhu H, Guan Y, Lam TT-Y. ggtree: an r package for visualization and  
770 annotation of phylogenetic trees with their covariates and other associated data. *Methods*  
771 *Ecol Evol*. 2017 Jan 1;8(1):28–36.
- 772 54. Shannon P, Markiel A, Ozier O, Baliga NS, Wang JT, Ramage D, et al. Cytoscape: A  
773 Software Environment for Integrated Models of Biomolecular Interaction Networks.  
774 *Genome Res*. 2003 Nov;13(11):2498–504.
- 775 55. Zankari E, Hasman H, Cosentino S, Vestergaard M, Rasmussen S, Lund O, et al.  
776 Identification of acquired antimicrobial resistance genes. *J Antimicrob Chemother*. 2012  
777 Nov;67(11):2640–4.

778

779

780

## 781 **Acknowledgments**

782 DMB was supported by USDA CRIS project 5090-31000-026-00-D. KB was supported by  
783 USDA NIFA AFRI grant 5090-31000-026-06-I, “Reassembly of Cattle Immune Gene Clusters  
784 for Quantitative Analysis.” KPB was supported by USDA CRIS project 5090-21000-064-00-D.  
785 TPLS was supported by USDA CRIS project 3040-31000-100-00-D. BJH and JVK were  
786 supported by USDA CRIS project 8042-32000-110-00-D. IL, STS, and MOP were supported by  
787 NIAID grant R44AI122654-02A1. SK and AMP were supported by the Intramural Research  
788 Program of the National Human Genome Research Institute, US National Institutes of Health.  
789 This work used the computational resources of the NIH HPC Biowulf cluster  
790 (<https://hpc.nih.gov>). GS was supported by a USDA NIFA AFRI Foundational grant 2015-  
791 67015-23246. The authors would like to thank Mark Boggess and Michael Maroney for helpful  
792 discussions.

793

794

## 795 **Author Contributions**

796 DMB, MW, SK, AMP and TPLS conceived the project and designed the experiments. KPB and  
797 LMC collected the rumen sample and extracted the DNA. CH, TPLS, IL, MOP and STS created  
798 sequencing libraries and sequenced the sample. DMB, MW, SK and TPLS wrote the manuscript.  
799 All other authors contributed specific analysis that was included in the submitted manuscript.

## 800 **Competing Interests**

801 CH is an employee of Pacific Biosciences. IL, MOP and STS are employees of Phase Genomics.  
802 The other authors declare no additional competing interests.

803

804

805 Table 1. Assembly statistics

| Assembly | Contigs   | Total Assembly Length | Contig N100K <sup>1</sup> |
|----------|-----------|-----------------------|---------------------------|
| Illumina | 2,182,263 | 5,111,042,186 bp      | 88                        |
| PacBio   | 77,670    | 1,076,426,244 bp      | 384                       |

806

807 <sup>1</sup> The contig N100K is defined as the total number of contigs that are greater than 100 kbp in  
808 length in the entire assembly.

809

810 Table 2. Assembly bin taxonomic assignment and gene content

| Assembly | Bin Set  | Avg # complete ORFs per contig <sup>2</sup> | Assembled Sequence Taxonomic Affiliation (Kbp) <sup>1</sup> |           |           |         |         |
|----------|----------|---------------------------------------------|-------------------------------------------------------------|-----------|-----------|---------|---------|
|          |          |                                             | Archaea                                                     | Bacteria  | Eukaryota | Viruses | No-Hits |
| Illumina | Unbinned | 1.10                                        | 25,843                                                      | 1,614,799 | 50,562    | 4,280   | 676,394 |
|          | AN       | 1.82                                        | 26,161                                                      | 2,273,837 | 79,804    | 2,083   | 357,193 |
|          | HC       | 6.53                                        | 1,101                                                       | 116,800   | 910       | 4       | 1,172   |
| PacBio   | Unbinned | 15.43                                       | 13,382                                                      | 1,024,348 | 9,031     | 2,340   | 27,323  |
|          | AN       | 15.79                                       | 7,096                                                       | 771,677   | 6,083     | 1,016   | 12,289  |
|          | HC       | 36.08                                       | 1,827                                                       | 45,204    | 569       | 0       | 51      |

811

812 <sup>1</sup> Superkingdom taxonomic affiliation was based on contig-level assignments derived from the  
813 BlobTools/DIAMOND workflow.

814 <sup>2</sup> Complete ORFs were defined as Prodigal predictions that had a “partial” status of “00”, which  
815 indicates the presence of a start and stop codon for the ORF.

816

## 817 Figure captions

818 Figure 1. Assembly workflow and sampling bias estimates show GC% discrepancies in long-  
819 reads vs assemblies. Using the same sample from a cannulated cow, (A) we extracted DNA  
820 using a modified bead beating protocol that still preserved a large proportion of high molecular  
821 weight DNA strands. This DNA extraction was sequenced on a short-read sequencer (Illumina;  
822 dark green) and a long-read sequencer (PacBio RSII and Sequel; dark orange), with each  
823 sequence source assembled separately. Assessments of read- and contig-level GC% bias (B)  
824 revealed that a substantial proportion of sampled low GC DNA was not incorporated into either  
825 assembly. (C) Assembly contigs were annotated for likely superkingdoms of origin and were

826 compared for overall contig lengths. The long-read assembly tended to have longer average  
827 contigs for each assembled superkingdom compared to the short-read assembly.

828

829 Figure 2. Identification of high quality bins in comparative assemblies highlights need for  
830 dereplication of different binning methods. (A). Binning performed by Metabat (light blue) and  
831 Proximeta Hi-C binning (Hi-C; blue) revealed that the long-read assembly consistently had  
832 fewer, longer contigs per bin than a short-read assembly. (B) Bin set division into Analysis (AN)  
833 and High Quality (HC) bins was based on DAS\_Tool single copy gene (SCG) redundancy and  
834 completeness. Assessment of SCG completeness and redundancy revealed 22 and 48 high  
835 quality bins in the long-read (C) and short-read (D) assemblies, respectively. The Proximeta Hi-  
836 C binning method performed better in terms of SCG metrics in the long-read assembly. (E) Plots  
837 of all of identified bins in the long-read (triangle) and short-read (circle) assemblies revealed a  
838 wide range of chimeric bins containing high SCG redundancy. Bins highlighted in the blue  
839 rectangle correspond to the AN bins identified by the DAS\_tool algorithm while the red  
840 rectangle corresponds to the HC bin set.

841

842 Figure 3. Dataset novelty compared to other rumen metagenome assemblies. Chord diagrams  
843 showing the contig alignment overlap (by base-pair) of the short-read (A) and long-read (B) AN  
844 bins to the Hungate1000 and Stewart et al. 2017 rumen microbial assemblies. The “Both”  
845 category consists of alignments of the short-read and long-read AN bins that have alignments to  
846 both Stewart et al. 2017 and the Hungate1000 datasets. (C) A dendrogram comparison of dataset  
847 sampling completeness compared to 16S V4 amplicon sequence data analysis. The outer rings of  
848 the dendrogram indicate presence (blue) or absence (red) of the particular phylotype in each  
849 dataset. Datasets are represented in the following order (from outer edge to internal edge): (1) the  
850 short-read assembly contigs, (2) the long-read assembly contigs, (3) and 16S V4 amplicon  
851 sequence data. The internal dendrogram represents each phylum in a different color (see legend),  
852 with individual tiers corresponding to the different levels of taxonomic affiliation. The outermost  
853 edge of the dendrogram consists of the genus-level affiliation.

854

855 Figure 4. Network analysis of long-read alignments and Hi-C inter-contig links identifies hosts  
856 for assembled viral contigs. In order to identify putative hosts for viral contigs, PacBio read  
857 alignments (light blue edges) and Hi-C inter-contig link alignments (dark blue edges) were  
858 counted between viral contigs (hexagons) and non-viral contigs (circles) in the long-read  
859 assembly (A) and the short-read assembly (B). Instances where both PacBio reads and Hi-C  
860 inter-contig links supported a viral-host assignment are also labeled (red edges). The long-read  
861 assembly enabled the detection of more viral host-associations in addition to several cases where  
862 viral contigs may display cross-species infectivity. We identified several viral contigs that infect  
863 important species in the rumen, including those from the genus *Sutterella*, and several species  
864 that metabolize sulfur. In addition, we identified a candidate viral-association with a novel genus  
865 of rumen microbes identified in this study.

866

867 Figure 5. CRISPR array identification and ARG allele class counts were influenced by assembly  
868 quality. (A) The long-read assembly (dark orange) contigs had fewer identified CRISPR arrays  
869 than the short-read contigs (dark green); however, the CRISPR arrays with the largest count of  
870 spacers were overrepresented in the long-read assembly. (B) The long-read assembly had 13-fold  
871 higher anti-microbial resistance gene (ARG) alleles than the short-read assembly despite having  
872 5-fold less sequence data coverage. The Macrolide, Lincosamide and Tetracycline ARG classes  
873 were particularly enriched in the long-read assembly compared to alleles identified in the short-  
874 read assembly.

875

876 Figure 1

**a**

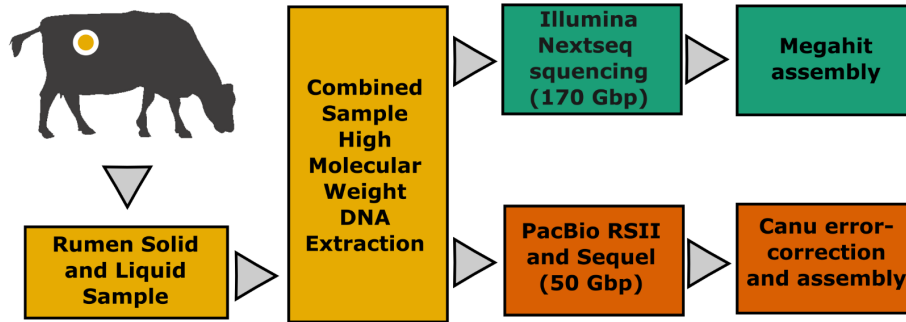

**b**

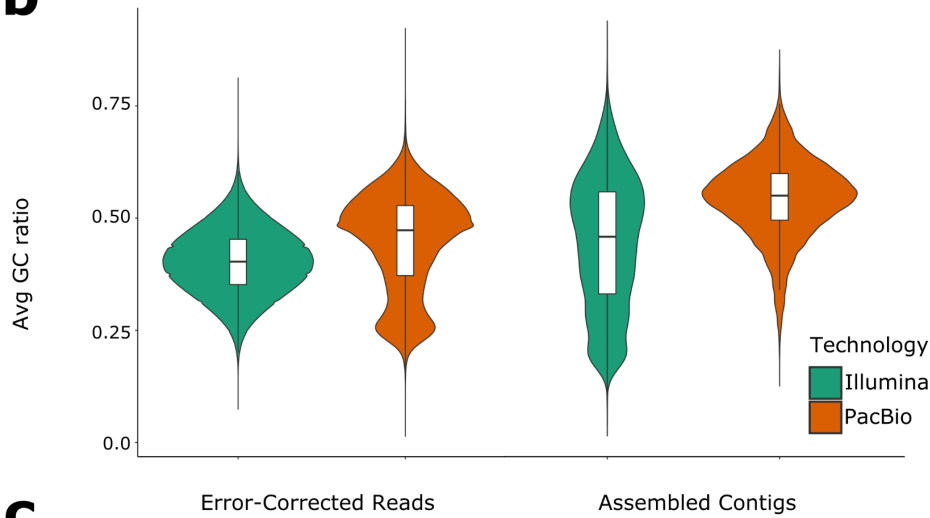

**c**

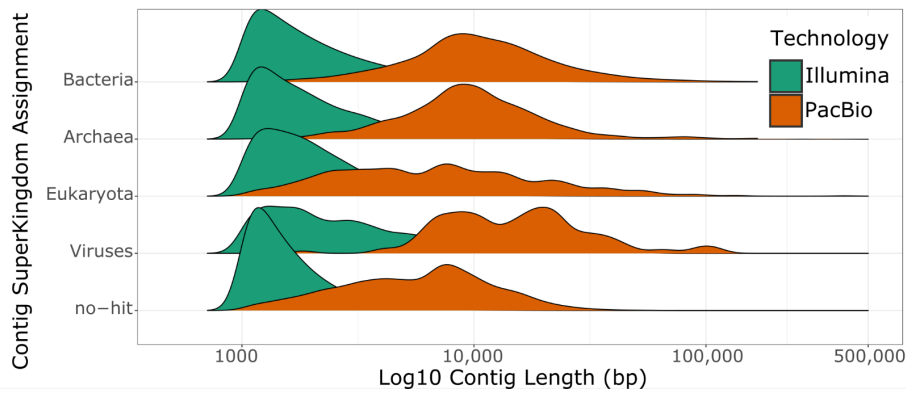

877

878

879 Figure 2

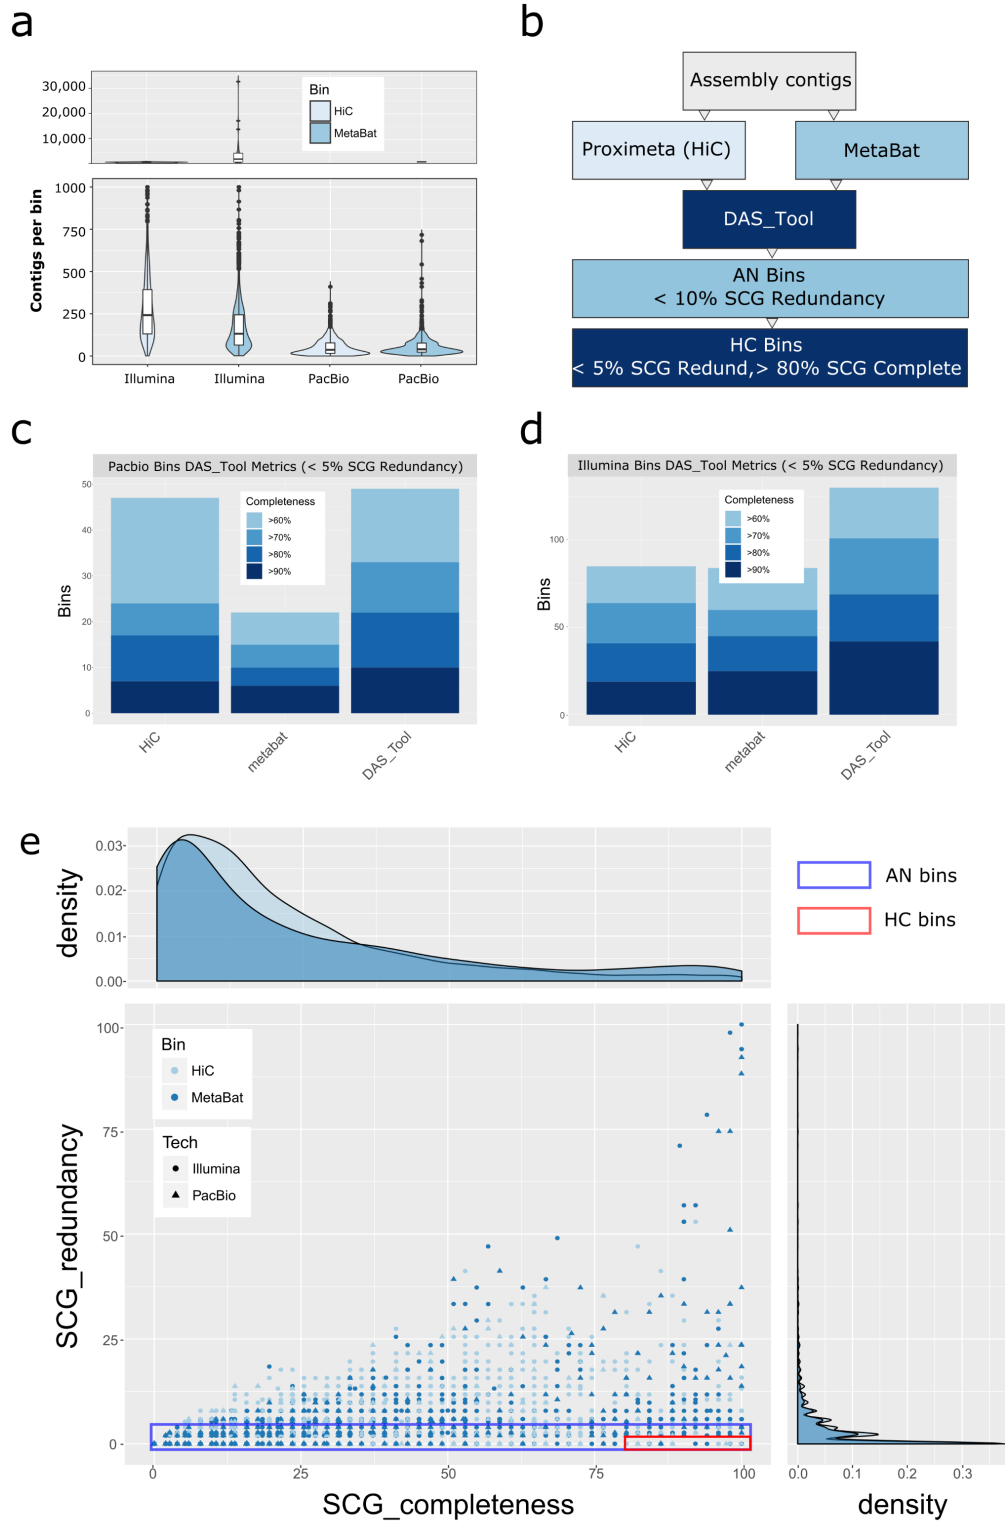

880

881



882 Figure 3

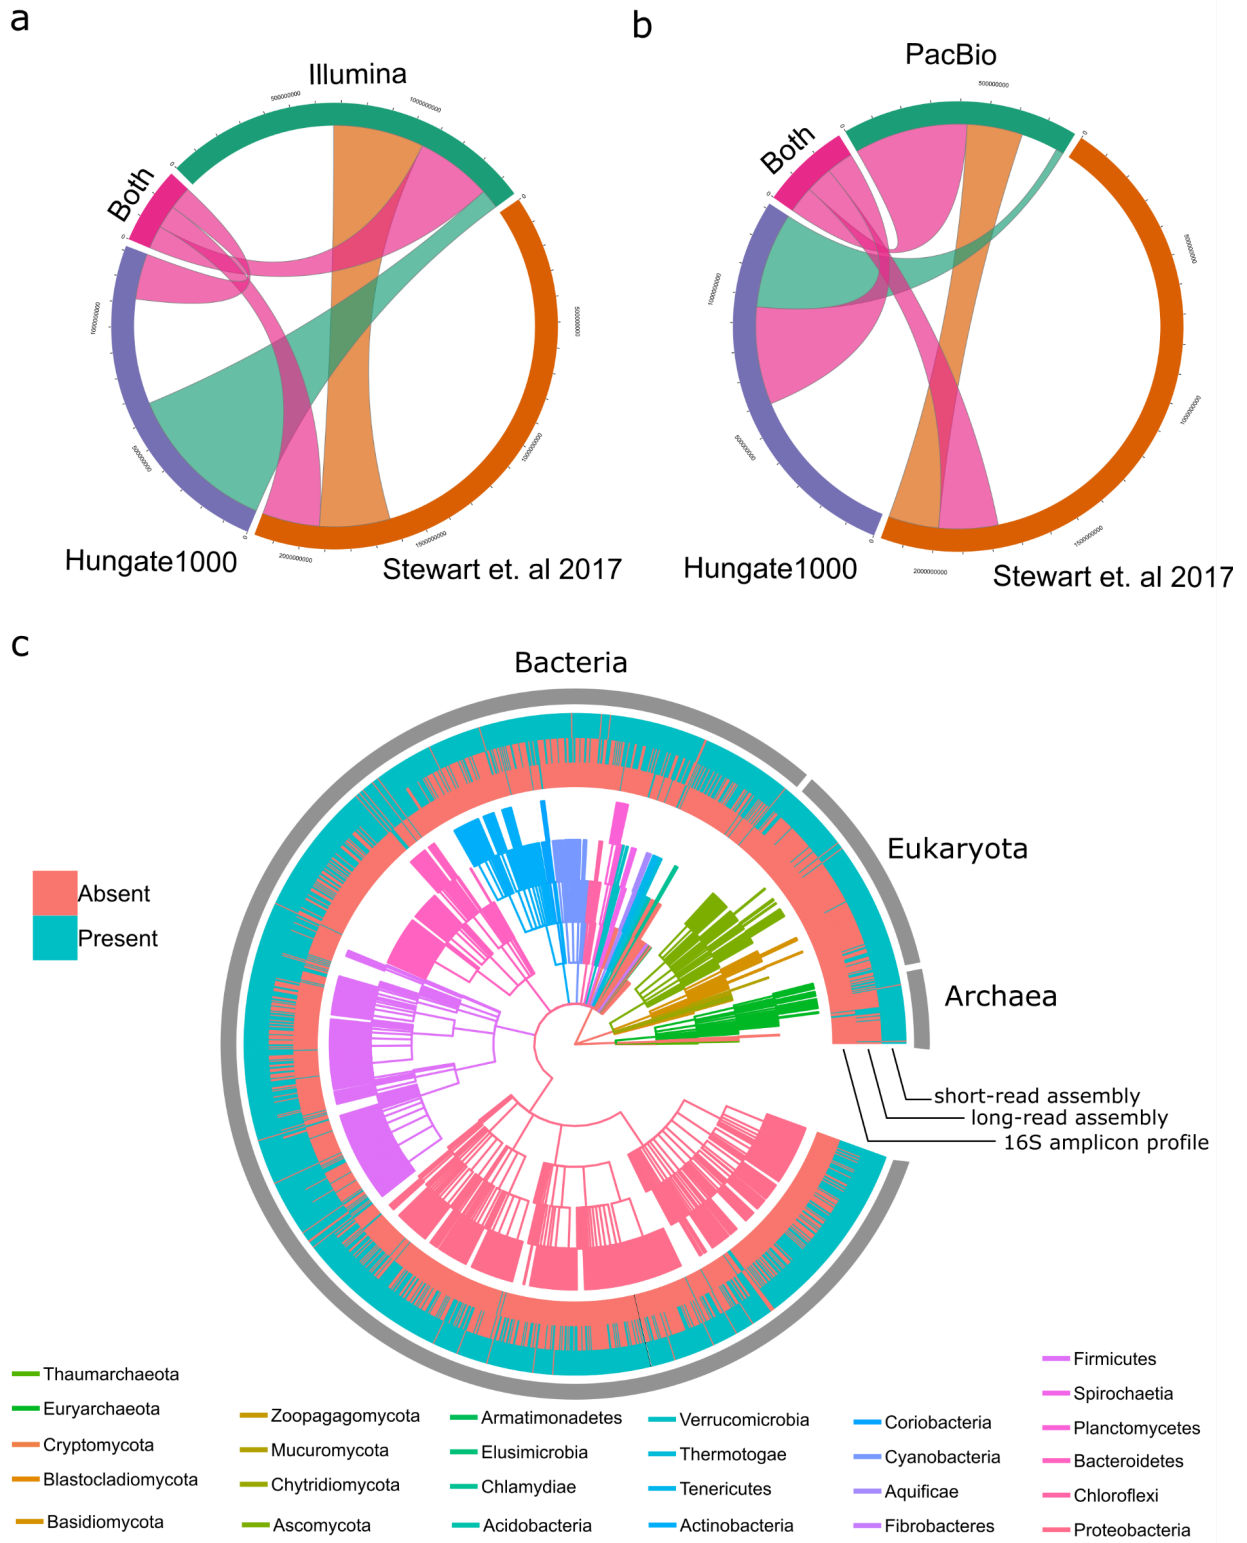

883

**a**

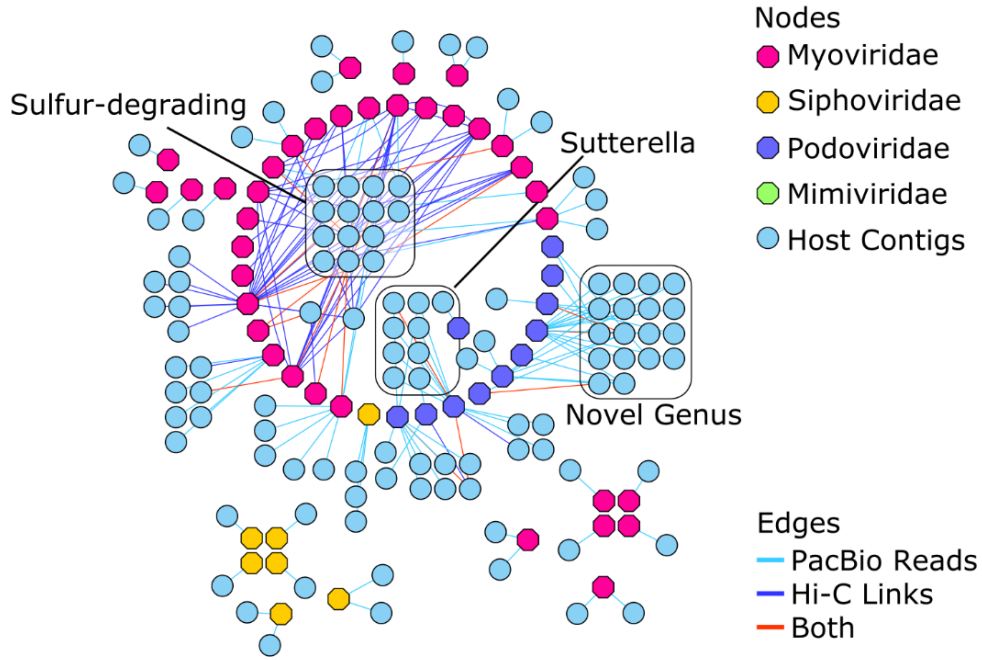

**b**

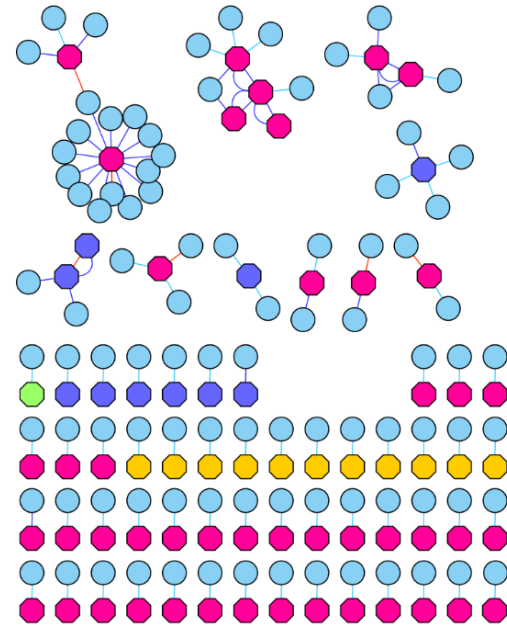

886 Figure 5

a

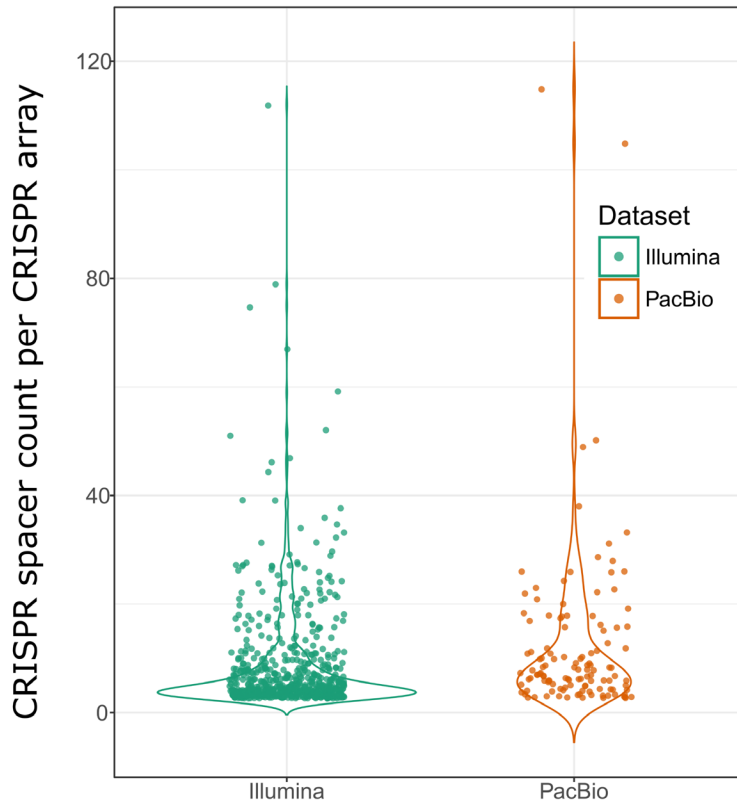

b

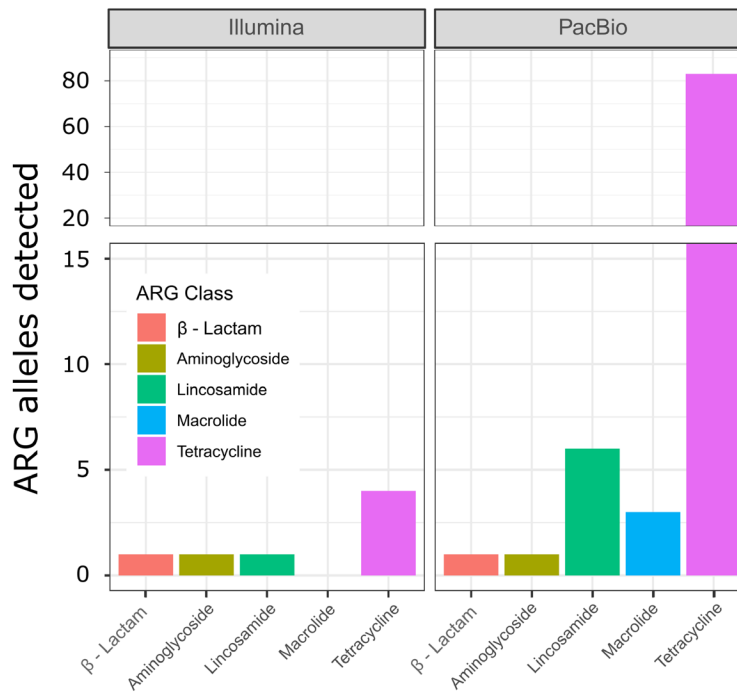

887
